# Supplementary material for: Temporal Inhomogeneities in High-Resolution Gridded Precipitation Products for the Southeastern United States
Source: Copernicus journal article supplement (doi:10.5194/egusphere-2025-5719), 2025-11-21

PRISM LT July 2002

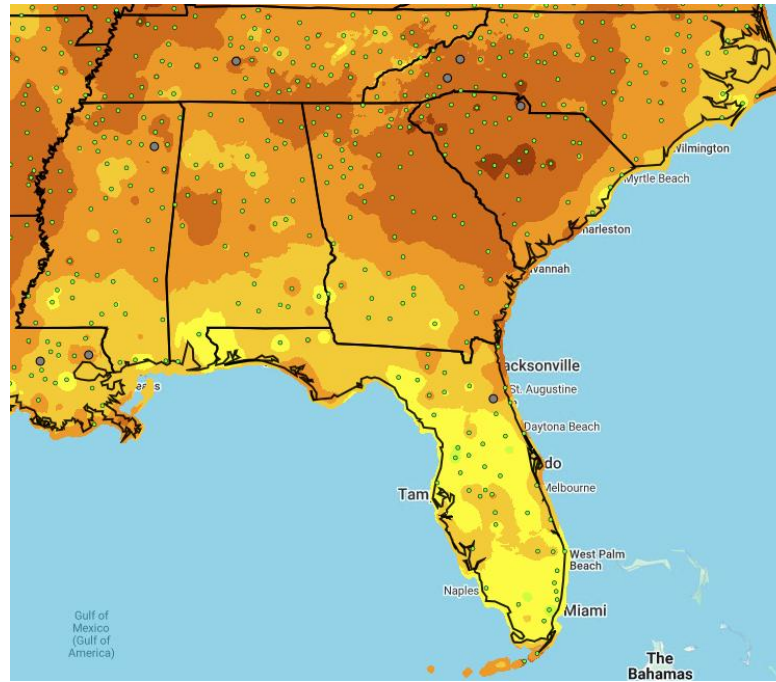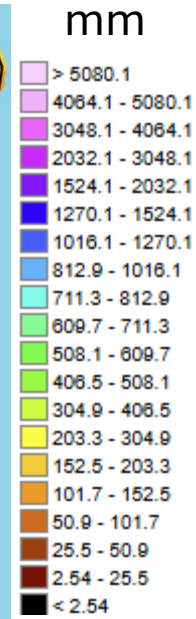

PRISM AN July 2002

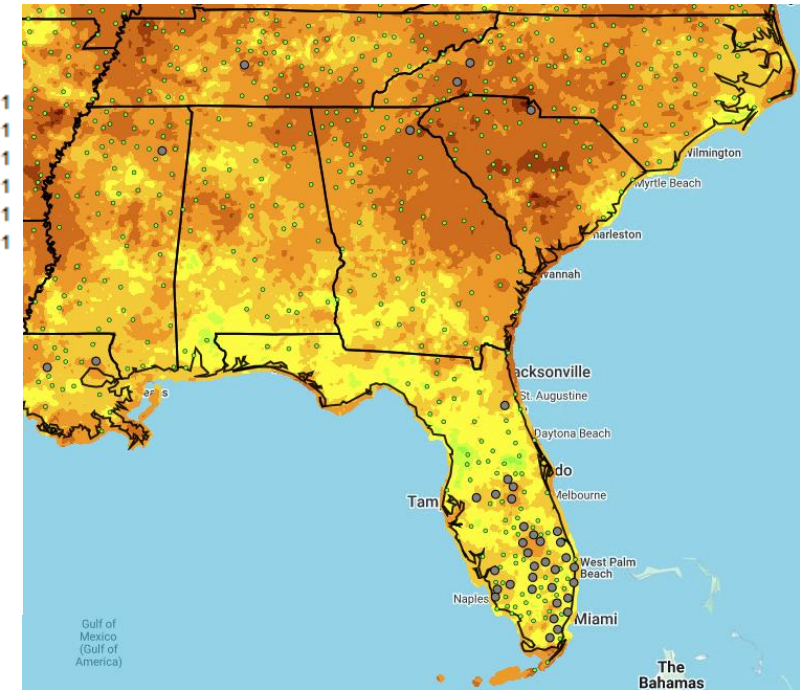

Supplement: Supplementary file [file egusphere-2025-5719-RC1-supplement.pdf]
